# Supplementary material
Source: Springer Nature journal article supplement (https://www.springermedizin.de/resource/supplementary/12916_2012_650_MOESM6_ESM.pdf/9598002)

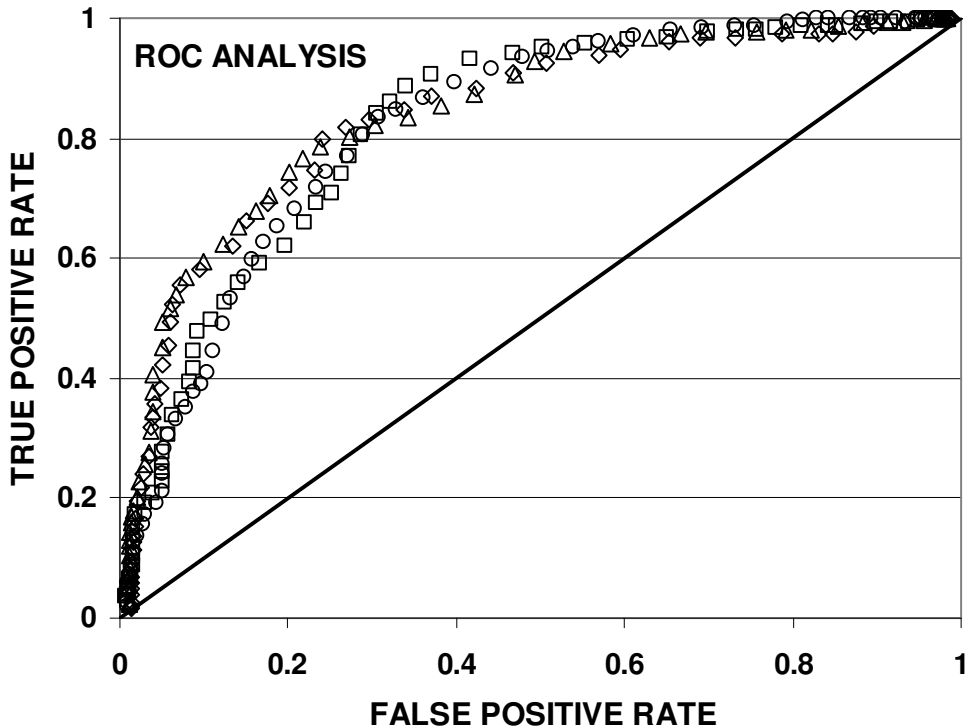

◇ 2 proteins    △ 3 proteins    ○ 4 proteins    □ 5 proteins

Supplement: MOESM6 [file 9598002]
